# Supplementary material for: Hospitalisations Related to the Combination of ACE Inhibitors and/or Angiotensin Receptor Blockers with Diuretics and NSAIDs: A Post Hoc Analysis on the Risks Associated with Triple Whammy
Source: MDPI journal article supplement (doi:10.3390/healthcare11020238), 2023-01-12

**Supplementary Figure**

**Figure S1.** Reporting odds ratios (RORs) of hospitalisation for all patients on triple whammy, according to age, sex, presence of a renal event, and class of suspected and concomitant medications

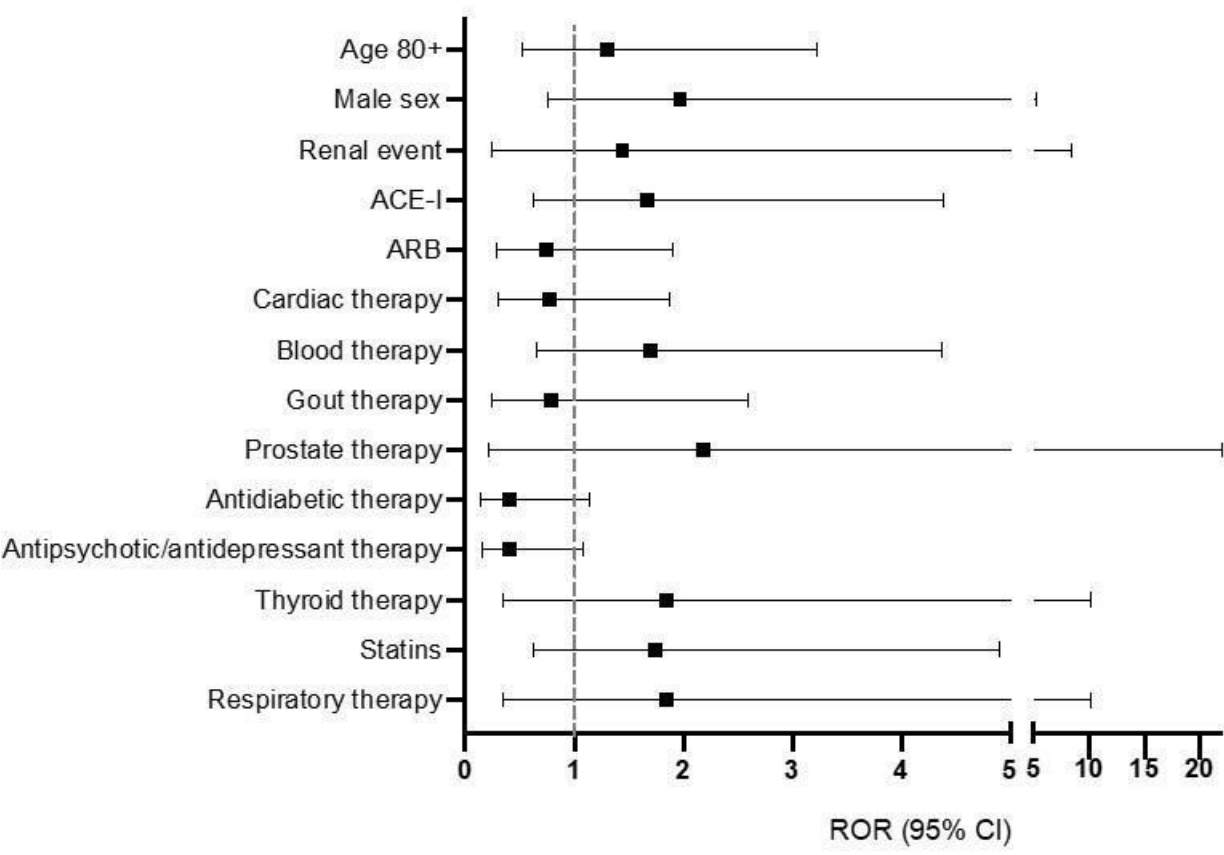

Supplement: s1 [file s1]
